# Supplementary material for: Factors Associated with the Risk of Major Adverse Cardiovascular Events in Patients with Ankylosing Spondylitis: A Nationwide, Population-Based Case—Control Study
Source: MDPI journal article supplement (doi:10.3390/ijerph19074098), 2022-03-30
Supplement: s1 [file s1]

## Supplementary material

**Table S1** – The International Codes of Diseases–Ninth Revision Clinical Modification codes of the diseases and manifestations

| Disease name                                                                                 | International Codes of Diseases–Ninth Revision Clinical Modification codes |
|----------------------------------------------------------------------------------------------|----------------------------------------------------------------------------|
| Ankylosing spondylitis                                                                       | 720.0                                                                      |
| Components of major adverse cardiovascular events                                            |                                                                            |
| Myocardial infarction                                                                        | 410.X, except for 410.X2                                                   |
| Ischaemic stroke                                                                             | 433-436, except for 433.X0 and 434.X0                                      |
| Percutaneous coronary intervention, percutaneous transluminal coronary angioplasty, or stent | Procedure codes 00.66, 36.03, 36.06, 36.07, and 36.09                      |
| Coronary artery bypass graft                                                                 | Procedure codes 36.1 and 36.2                                              |
| Comorbidities                                                                                |                                                                            |
| Hypertension                                                                                 | 401–405                                                                    |
| Hyperlipidaemia receiving lipid-lowering agents                                              | 272                                                                        |
| Diabetes mellitus                                                                            | 250                                                                        |
| Chronic kidney disease                                                                       | 580–587                                                                    |
| Heart failure                                                                                | 428                                                                        |
| Valvular heart disease                                                                       | 093.2, 394-397, 424, 746.3-746.6                                           |
| Chronic obstructive pulmonary disease                                                        | 490-493, 496                                                               |
| Extra-articular manifestations                                                               |                                                                            |
| Acute anterior uveitis                                                                       | 364.00–364.02, 364.04–364.05, 364.3                                        |
| Psoriasis                                                                                    | 6961                                                                       |
| Inflammatory bowel disease                                                                   | 555, 556                                                                   |

**Table S2** – Incidence of MACE in the identified population with AS (n = 42595, person-years = 245279)

| Variables                                | Patients with events, n (%) | Total person-years | Incidence rate (95% CI) <sup>1</sup> |
|------------------------------------------|-----------------------------|--------------------|--------------------------------------|
| MACE                                     | 1151 (2.70)                 | 245279             | 469.26 (469.18-469.35)               |
| Male (n=27236)                           | 766 (2.81)                  | 158299             | 483.89 (483.79-484.00)               |
| Female (n=15359)                         | 385 (2.51)                  | 86980              | 442.63 (442.49-442.77)               |
| AS diagnosis at age < 65 years (n=38231) | 612 (1.60)                  | 222250             | 275.37 (275.30-275.43)               |
| AS diagnosis at age ≥ 65 years (n=4364)  | 539 (12.35)                 | 23029              | 2340.47 (2339.84-2341.09)            |
| Myocardial infarction                    | 241 (0.57)                  | 248329             | 97.05 (97.01-97.09)                  |
| Male (n=27236)                           | 179 (0.66)                  | 160181             | 111.75 (111.70-111.80)               |
| Female (n=15359)                         | 62 (0.40)                   | 88148              | 70.34 (70.28-70.39)                  |
| AS diagnosis at age < 65 years (n=38231) | 142 (0.37)                  | 223846             | 63.44 (63.40-63.47)                  |
| AS diagnosis at age ≥ 65 years (n=4364)  | 99 (2.27)                   | 24483              | 404.36 (404.10-404.61)               |
| Ischemic stroke                          | 646 (1.52)                  | 246934             | 261.61 (261.54-261.67)               |
| Male (n=27236)                           | 388 (1.42)                  | 159534             | 243.21 (243.13-243.29)               |
| Female (n=15359)                         | 258 (1.68)                  | 87400              | 295.19 (295.08-295.31)               |
| AS diagnosis at age < 65 years (n=38231) | 296 (0.77)                  | 223300             | 132.56 (132.51-132.60)               |
| AS diagnosis at age ≥ 65 years (n=4364)  | 350 (8.02)                  | 23634              | 1480.93 (1480.44-1481.43)            |
| Coronary artery bypass graft             | 53 (0.12)                   | 248805             | 21.30 (21.28-21.32)                  |
| Male (n=27236)                           | 43 (0.16)                   | 160546             | 26.78 (26.76-26.81)                  |

|                                          |            |        |                        |
|------------------------------------------|------------|--------|------------------------|
| Female (n=15359)                         | 10 (0.07)  | 88259  | 11.33 (11.31-11.35)    |
| AS diagnosis at age < 65 years (n=38231) | 33 (0.09)  | 224158 | 14.72 (14.71-14.74)    |
| AS diagnosis at age ≥ 65 years (n=4364)  | 20 (0.46)  | 24647  | 81.14 (81.03-81.26)    |
| <hr/>                                    |            |        |                        |
| Percutaneous coronary intervention       | 471 (1.11) | 247467 | 190.33 (190.27-190.38) |
| Male (n=27236)                           | 356 (1.31) | 159558 | 223.12 (223.04-223.19) |
| Female (n=15359)                         | 115 (0.75) | 87909  | 130.82 (130.74-130.89) |
| AS diagnosis at age < 65 years (n=38231) | 302 (0.79) | 223308 | 135.24 (135.19-135.29) |
| AS diagnosis at age ≥ 65 years (n=4364)  | 169 (3.87) | 24159  | 699.54 (699.21-699.88) |

<sup>1</sup>per 100000 person-years. AS, ankylosing spondylitis. MACE, major adverse cardiovascular event.
